# Supplementary material for: A biocatalytic and thermoreversible hydrogel from a histidine-containing tripeptide
Source: Royal Society of Chemistry journal article supplement (doi:10.1039/c7cc03371k), 2017-01-01

## **Supporting Information**

### **Biocatalytic and thermoreversible hydrogel from a histidine-containing tripeptide**

A. M. Garcia<sup>1</sup>, M. Kurbasic<sup>1</sup>, S. Kralj<sup>1,2</sup>, M. Melchionna<sup>1</sup>, and S. Marchesan<sup>1\*</sup>.

<sup>1</sup>Chem. Pharm. Sc. Dept., University of Trieste, Via L. Giorgieri 1, 34127 Trieste, Italy.

<sup>2</sup> Materials Synthesis Dept., Jožef Stefan Institute, Jamova 39, 1000 Ljubljana, Slovenia

email: [smarchesan@units.it](mailto:smarchesan@units.it), [marchesan.silvia@gmail.com](mailto:marchesan.silvia@gmail.com)

## **Table of Contents**

---

|                                                       |    |
|-------------------------------------------------------|----|
| 1. Materials.....                                     | 2  |
| 2. Peptide Synthesis.....                             | 2  |
| 3. His-Phe-Phe spectroscopic data.....                | 3  |
| 4. p-NPA synthesis and spectroscopic data.....        | 5  |
| 5. Peptide gelation protocol.....                     | 7  |
| 6. ThT test for amyloid-like structure detection..... | 7  |
| 7. FT-IR spectroscopy.....                            | 7  |
| 8. Differential Scanning Calorimetry (DSC).....       | 8  |
| 9. Rheometry.....                                     | 8  |
| 10. Circular Dichroism.....                           | 9  |
| 11. TEM.....                                          | 9  |
| 12. AFM.....                                          | 10 |
| 13. Esterase activity assay.....                      | 10 |
| 14. TEM images of peptide below mgc.....              | 13 |

## 1. Materials and Methods

2-chlorotrytil resin, O-Benzotriazole-N,N,N,N'-tetramethyl-uronium-hexafluorophosphate (HBTU), and Fmoc protected *N*-trityl-L-histidine and D-phenylalanine were purchased from GL Biochem (Shanghai) Ltd. All solvents were purchased of analytical grade from Merck. Piperidine, trifluoroacetic acid (TFA), *N,N*-diisopropyl ethyl amine (DIPEA), triisopropyl silane (TIPS) were from Acros. Sodium dihydrogen phosphate and disodium hydrogen phosphate were from BDH AnalaR. High purity Milli-Q-water (MQ water) with a resistivity greater than 18 M  $\Omega$  cm was obtained from an in-line Millipore RiOs/Origin system.  $^1\text{H}$ -NMR spectra were recorded at 400 MHz and  $^{13}\text{C}$ -NMR spectra were recorded at 100 MHz on a Varian Innova Instrument with chemical shift reported as ppm (in DMSO or MeCN with tetramethylsilane as internal standard). ESI-MS spectra were recorded on an Agilent 6120 single quadrupole LC-MS system.

## 2. Peptide synthesis

The peptide was synthesised using standard Fmoc solid phase peptide synthesis with HBTU activation. Briefly, Fmoc-amino acid deprotection was performed in a sintered funnel, with continuous stirring, in 20% piperidine in *N,N*-dimethylformamide (DMF) for 20 minutes (2 x 10 minutes) until both bromophenol blue and acetaldehyde/chloranil tests were positive. HBTU activation was performed with 2.5 equiv. of Fmoc-amino acid, 2.0 equiv. of HBTU and 2.0 equiv. of HOAt in DMF (4 mL for every equiv. of resin), with DIPEA (2 mL of a 1 M solution in DMF for every equiv. of resin). Coupling was performed at room temperature for 1.5 h in a sintered funnel with continuous stirring, and completeness was monitored by both bromophenol blue and acetaldehyde/chloranil tests after thorough washes with DMF and DCM. Final cleavage was obtained using a mixture of TFA/DCM/TIPS/water (47.5:47.5:2.5:2.5). The crude peptide was too hydrophobic to be precipitated in cold ether, thus the majority of TFA was evaporated under argon flow, and the remaining oil was dissolved in a mixture of acetonitrile/water

and then purified by reverse-phase HPLC (Agilent Technologies). The HPLC Agilent 1260 Infinity system was equipped with a preparative gradient pump (1311B), semipreparative C-18 column (Kinetex, 5 microns, 100 Å, 250 x 10 mm, Phenomenex), autosampler (G1329B), Photodiode Array detector (G1315C). The gradient used consisted of acetonitrile (MeCN) / water with 0.1% TFA with the following program: t = 0–2 min. 25% MeCN; t = 12 min. 50% MeCN; t = 15 min. 95% MeCN; t = 16 min. 95% MeCN ( $t_R$  = 6.8 min). The compound was then freeze-dried to yield the corresponding peptide as a white fluffy powder. Peptide identity was verified by ESI-MS,  $^1\text{H}$ -NMR and  $^{13}\text{C}$ -NMR.

### 3. L-His-D-Phe-D-Phe spectroscopic data

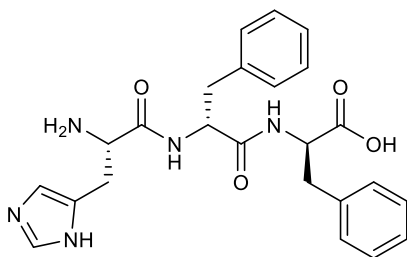

**$^1\text{H}$  NMR** (400 MHz,  $\text{DMSO}-d_6$ )  $\delta$  (ppm): 8.89 (s, 1H, NH), 8.73 (d,  $J$  = 8.8 Hz, 1H, NH), 8.67 (d,  $J$  = 7.9 Hz, 1H, NH), 8.12 (s, 3H,  $\text{NH}_3^+$ ), 7.34 – 7.06 (m, 11H, Ar), 6.87 (s, 1H, CH), 4.71 (m, 1H,  $\alpha\text{CH}$ ), 4.44 (m, 1H,  $\alpha\text{CH}$ ), 4.07 (dd,  $J$  = 7.9, 4.9 Hz, 1H,  $\alpha\text{CH}$ ), 3.15 – 3.01 (m, 2H,  $\beta\text{CH}_2$ ), 2.98 – 2.83 (m, 2H,  $\beta\text{CH}_2$ ), 2.75 – 2.59 (m, 2H,  $\beta\text{CH}_2$ ).  **$^{13}\text{C}$  NMR** (100 MHz,  $\text{DMSO}-d_6$ )  $\delta$  (ppm): 173.1, 171.2, 167.3 (3 x CO); 137.9, 137.7, 134.8, 129.7, 129.5, 128.7, 128.5, 127.0, 126.9 (Ar); 54.2, 54.0, 51.5 (3 x  $\alpha\text{C}$ ); 38.7, 37.0, 26.8 (3 x  $\beta\text{C}$ ). **MS (ESI):**  $m/z$  450.2 ( $\text{M}+\text{H}$ ) $^+$  472.2 ( $\text{M}+\text{Na}$ ) $^+$   $\text{C}_{24}\text{H}_{27}\text{N}_5\text{O}_4$  requires 450.2

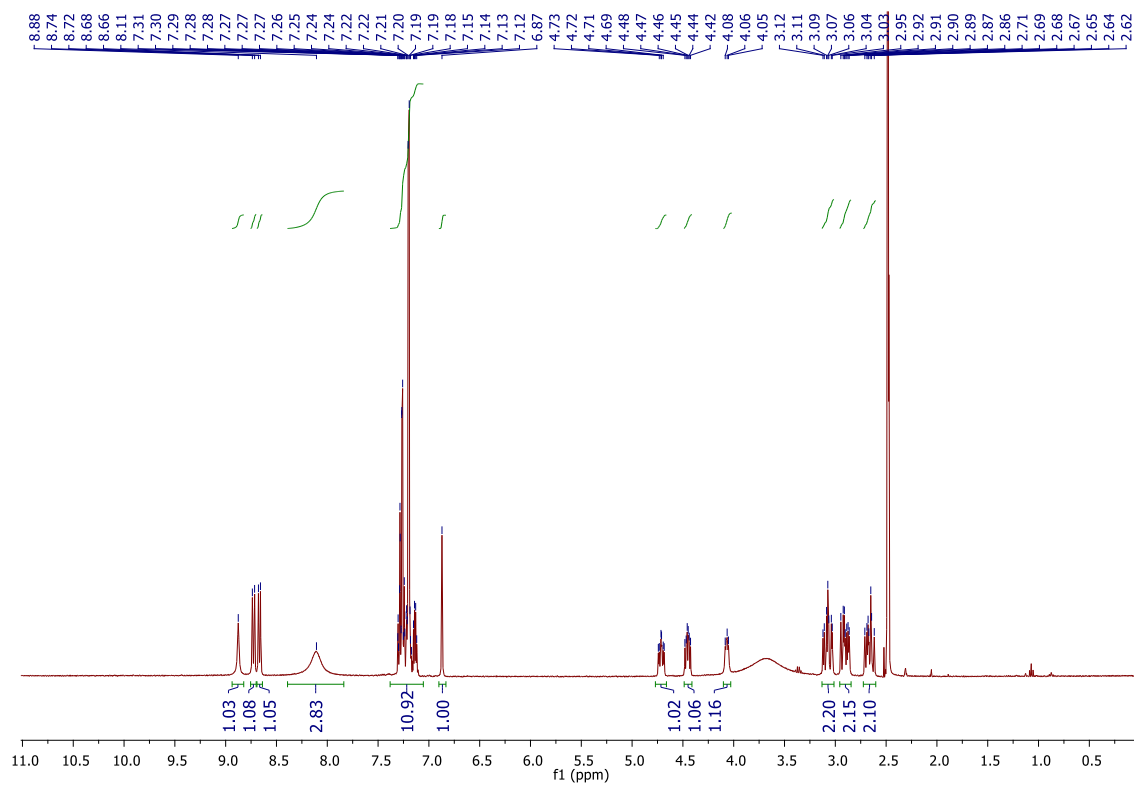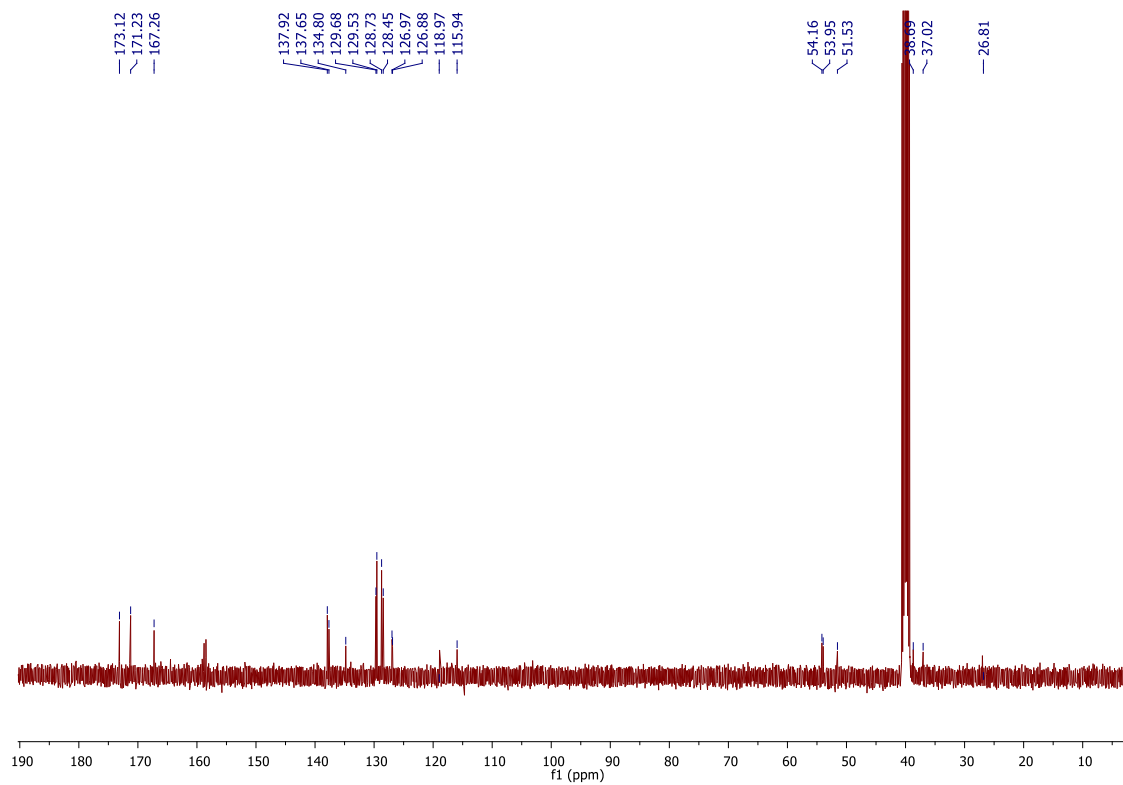

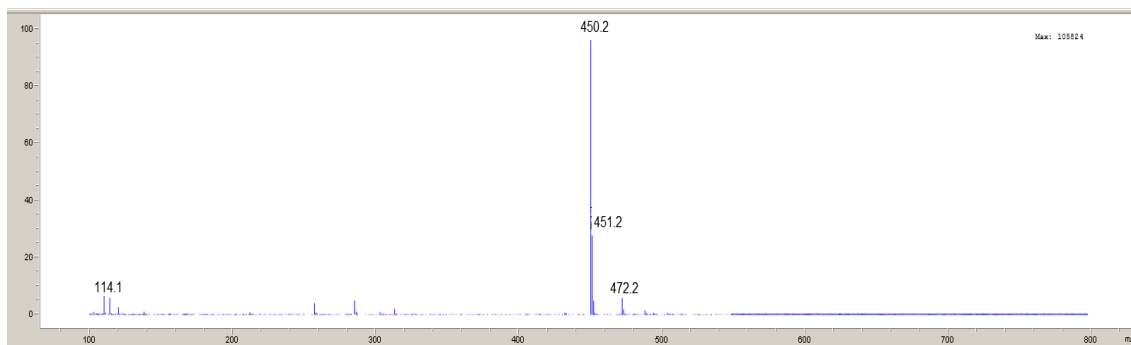

Analytical LC purity >97% (solvent gradient: 5 % to 95% MeCN 0.1 % TFA in 11 min.)

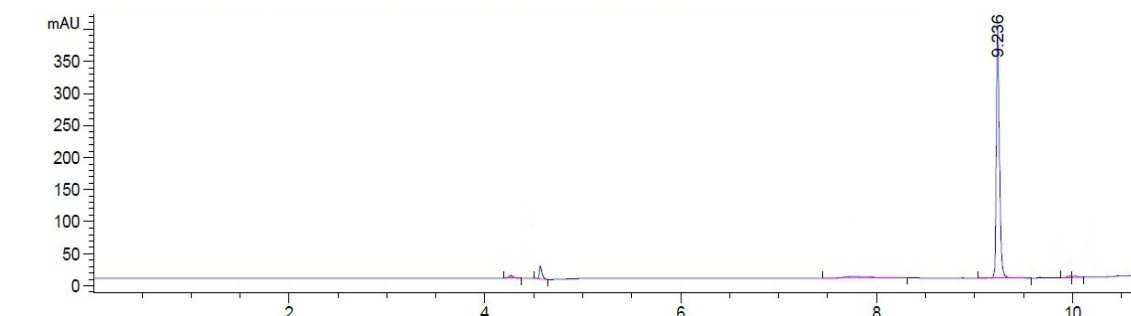

#### 4. p-nitrophenyl acetate synthesis and spectroscopic data

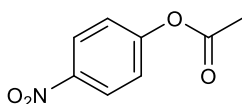

**Procedure.** Synthesis of 4-nitrophenyl-acetate was done according to standard literature methods. 0.20 mmol mmol of 4-nitrophenol, 0.24 mmol acetic anhydride and 1 % DMAP catalyst were dissolved in 5 mL  $\text{CH}_2\text{Cl}_2$ . The reaction mixture was stirred at room temperature for 2 h and then extracted with HCl 0.1 M and dried over anhydrous sodium sulfate. Evaporation of dichloromethane yielded the ester as an oily material which was precipitated as a white solid in ethanol.  **$^1\text{H}$  NMR** (400 MHz,  $\text{MeCN-}d_3$ )  $\delta$  (ppm): 8.29 (d,  $J = 9.2$  Hz, 2H, Ar), 7.36 (d,  $J = 9.2$  Hz, 2H, Ar), 2.32 (s, 3H,  $\text{CH}_3$ ).  **$^{13}\text{C}$  NMR** (100 MHz,  $\text{MeCN-}d_3$ )  $\delta$  (ppm): 168.8 (CO), 155.7, 145.7, 125.2, 122.9 (Ar), 20.82 (Me).

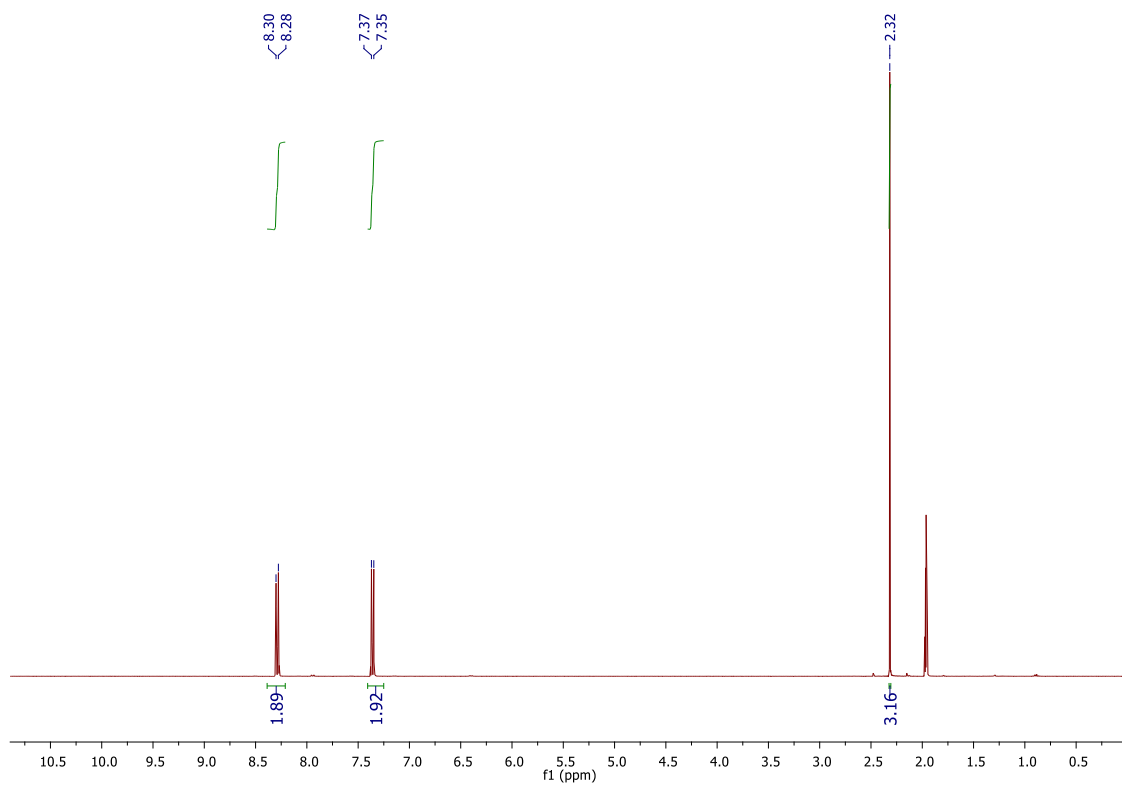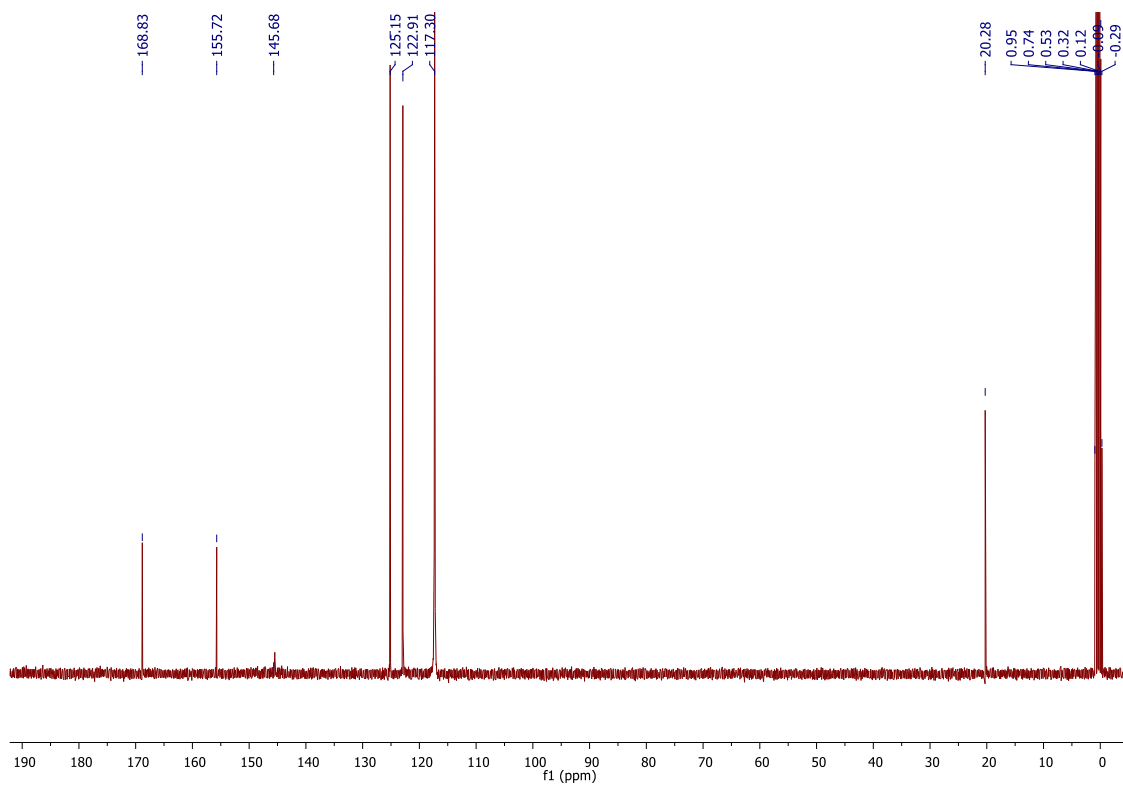

## 5. Peptide gelation

The peptide L-His-D-Phe-D-Phe-COOH was dissolved in sodium phosphate buffer (0.1 M pH 11.8) to a final concentration of 50 mM, getting a final pH of  $7.2 \pm 0.1$ . All buffer solutions were filtered (0.2  $\mu\text{m}$ ) prior to use.

## 6. ThT test for amyloid-like structure detection

Gel precursor solution (0.12 ml) was prepared as described above and immediately put on wells of Greiner 96 U Bottom Transparent Polystyrene. After 4 hours, 30  $\mu\text{l}$  of a solution of Thioflavin T (22.2  $\mu\text{M}$  in 20 mM glycine-NaOH pH 7.5, filtered with a 0.2  $\mu\text{m}$  filter) were added in the wells. After 15 minutes, the fluorescence emission was analysed using a Tecan Infinite M1000 pro, selecting an excitation wavelength of 446 nm and an emission wavelength of 490 nm, with a bandwidth of 20 nm. Each condition was repeated twice in triplicate. Average and standard deviations were calculated and plotted with Excel.

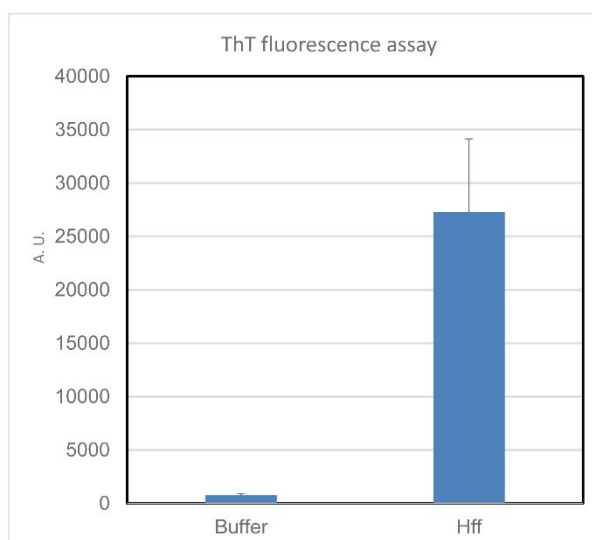

## 7. FT-IR spectroscopy

FT-IR spectra were registered using KBr-pellet method. The gel was prepared and after 24 h it was dried under vacuum. Then, it was mixed with KBr to make the pellet. The

spectrum was acquired from 400 to 4000  $\text{cm}^{-1}$ , at 1  $\text{cm}^{-1}$  resolution and 128 accumulations on a Perkin Elmer System 2000.

## 8. Differential Scanning Calorimetry (DSC)

DSC data were collected on a Q100 calorimeter (TA Instruments). The hydrogel samples were prepared directly in the DSC pans (20  $\mu\text{l}$ ). Pans were closed with their lids, and measurements started after 20 min at room temperature. DSC scans started with an isotherm at 25  $^{\circ}\text{C}$  for 10 min, followed by a 5  $^{\circ}\text{C min}^{-1}$  ramp up to 200  $^{\circ}\text{C}$  (*i.e.*, below peptide decomposition temperature). Measurements were repeated twice.

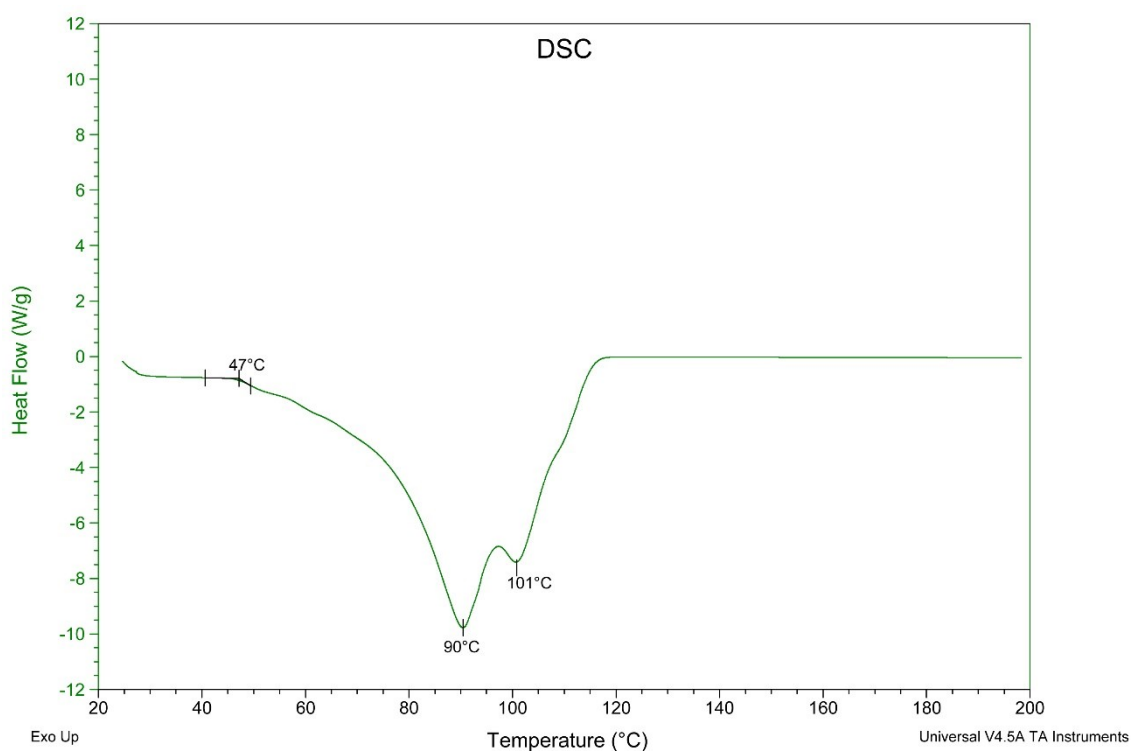

## 9. Rheometry

Dynamic time sweep rheological analysis was conducted on a Malvern Kinexus Ultra Plus Rheometer with a 20 mm stainless steel parallel plate geometry. The temperature was maintained at 25  $^{\circ}\text{C}$  using a Peltier temperature controller. Samples were prepared *in situ* and immediately analysed with a gap of 1.00 mm. Time sweeps were recorded for



1 hour, using a frequency of 1.00 Hz and a controlled stress of 5.00 Pa. After 1h, frequency sweeps were recorded using a controlled stress of 5.00 Pa and then stress sweeps were recorded using a frequency of 1 Hz.

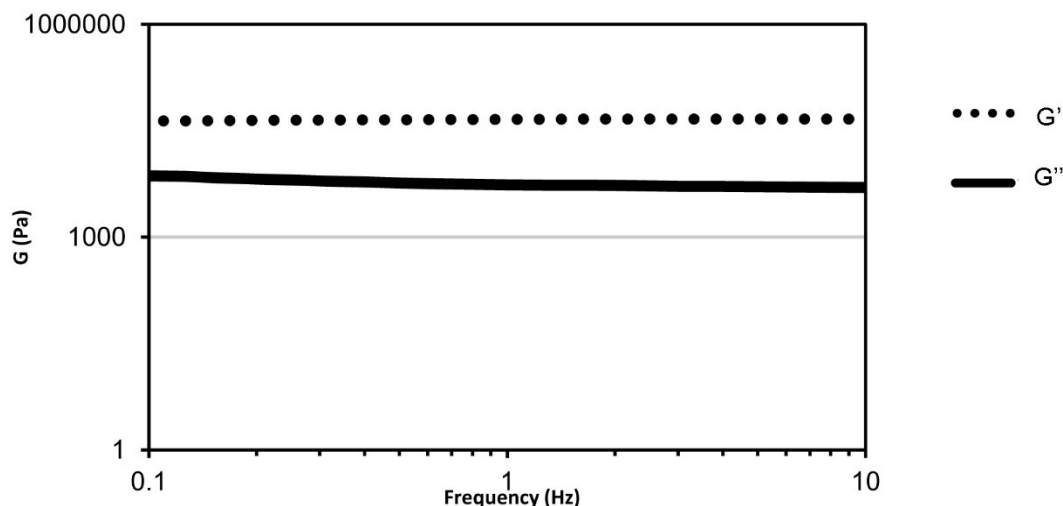

## 10. Circular Dichroism

A 0.1 mm quartz cell was used on a Jasco J815 Spectropolarimeter, with 1s integrations, 1 accumulation and a step size of 1nm with a bandwidth of 1nm over a range of wavelengths from 220 to 280 nm at 25 °C (Peltier). Samples were freshly prepared directly in the CD cell and the spectra immediately recorded.

## 11. TEM

TEM micrographs were acquired on Jeol, JEM 2100, Japan, at 100 kV. TEM grids (copper-grid-supported lacey carbon film) were first exposed to the UV-ozone cleaner (UV-Ozone Procleaner Plus) for 45 mins to make the grid surface more hydrophilic. Then, 24-hours-aged gels were precisely deposited on a TEM grid, dried for 15 mins at RT, and contrasted by aqueous tungsten phosphate solution (pH 7.4).

## 12. AFM

Gels were prepared as described above and after 24 hours they were spread on a mica surface. Atomic Force Microscopy (AFM) measurements were performed using a Nanoscope V microscope (Digital Instruments Metrology Group, model MMAFMLN) in tapping mode in air at room temperature, using standard  $\mu\text{masch}^{\circledR}$  SPM probe (HQ:NSC15/AIBS) with tip height 12-18 $\mu\text{m}$ , cone angle  $<40^{\circ}$  (Resonant frequency 325kHz, force constant of  $\sim 40 \text{ N m}^{-1}$ ). Image analysis was performed with Gwiddion software.

## 13. Esterase activity assay

Gel precursor solutions were prepared as described above and 98  $\mu\text{l}$  of phosphate buffer 0.1M pH 11.8 were immediately put on wells of Greiner 96 U Bottom Transparent Polystyrene. Final pH was  $7.2 \pm 0.1$ . Controls were run in phosphate buffer 0.1M at the same pH, with a final peptide concentration of 1 mM, 10 mM, 25 mM, or buffer alone. After 4 hours, 2  $\mu\text{l}$  of a solution of pNPA (10 mM in MeOH) were added to the wells. Absorbance at 405 nm was monitored for 1 hour on a Tecan Infinite M1000 pro. Each condition was repeated twice in triplicate. Average and standard deviations were calculated and plotted with Excel.

Calibration curve using pNP standard solutions

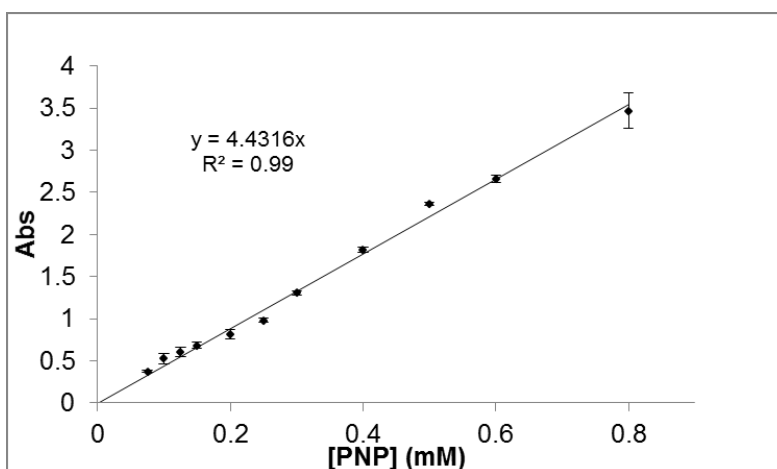

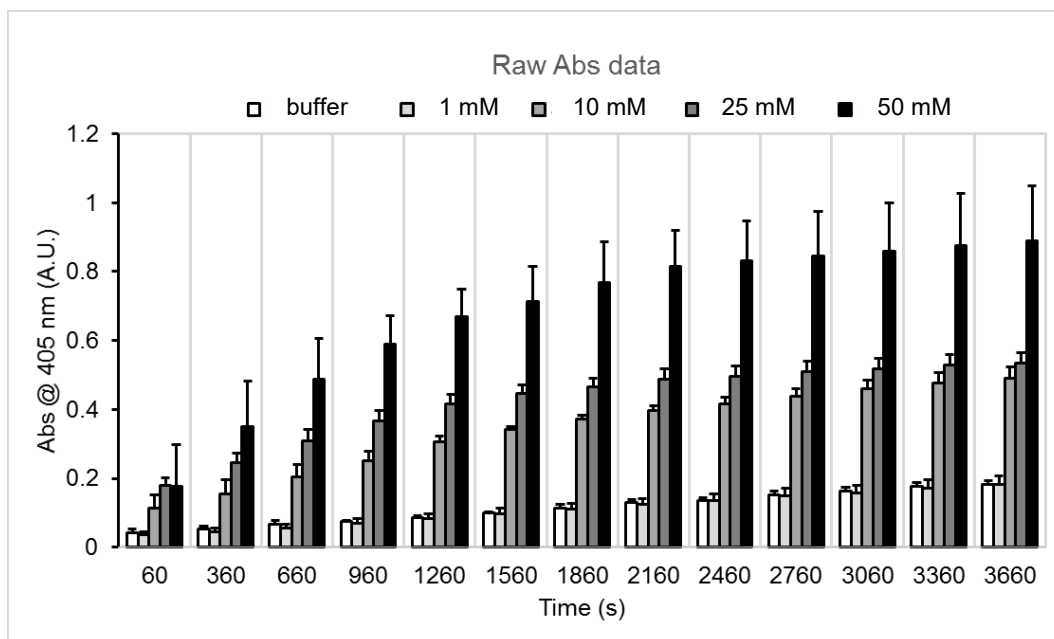

$K_{obs}$  for buffer and peptide (1mM) controls

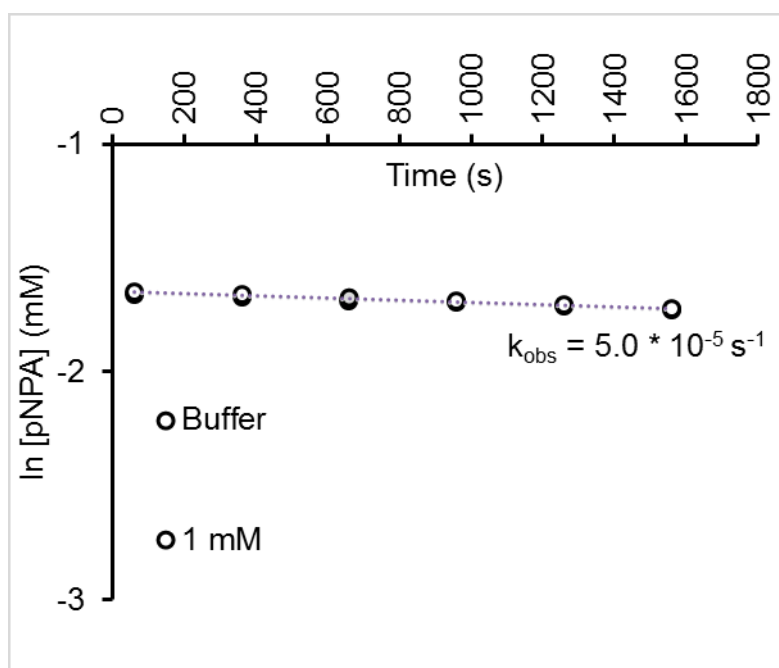

The gel (50 mM peptide) was also tested for catalytic activity as described above, but with higher amount of substrate (1 mM pNPA).  $K_{\text{obs}} = 1.7 \times 10^{-3} \text{ s}^{-1}$ . Data is shown below.

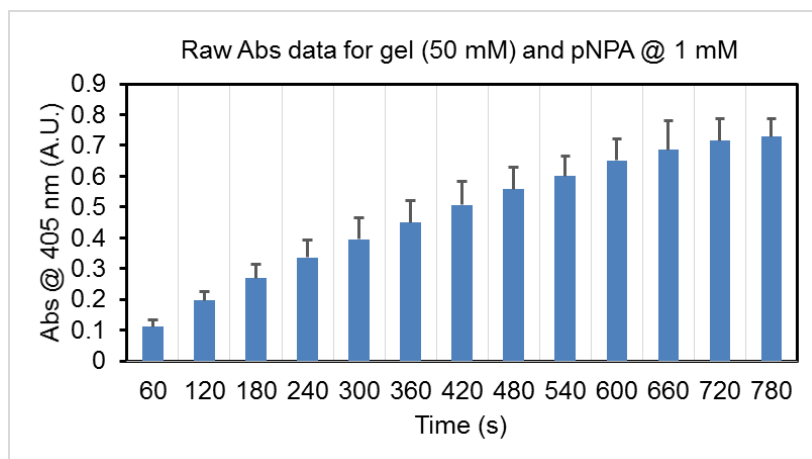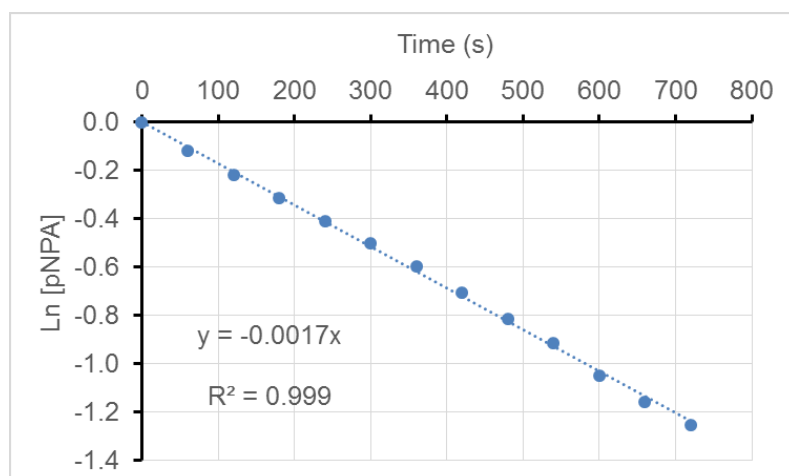

#### 14. TEM images of peptide below mgc

Peptide at 25 mM

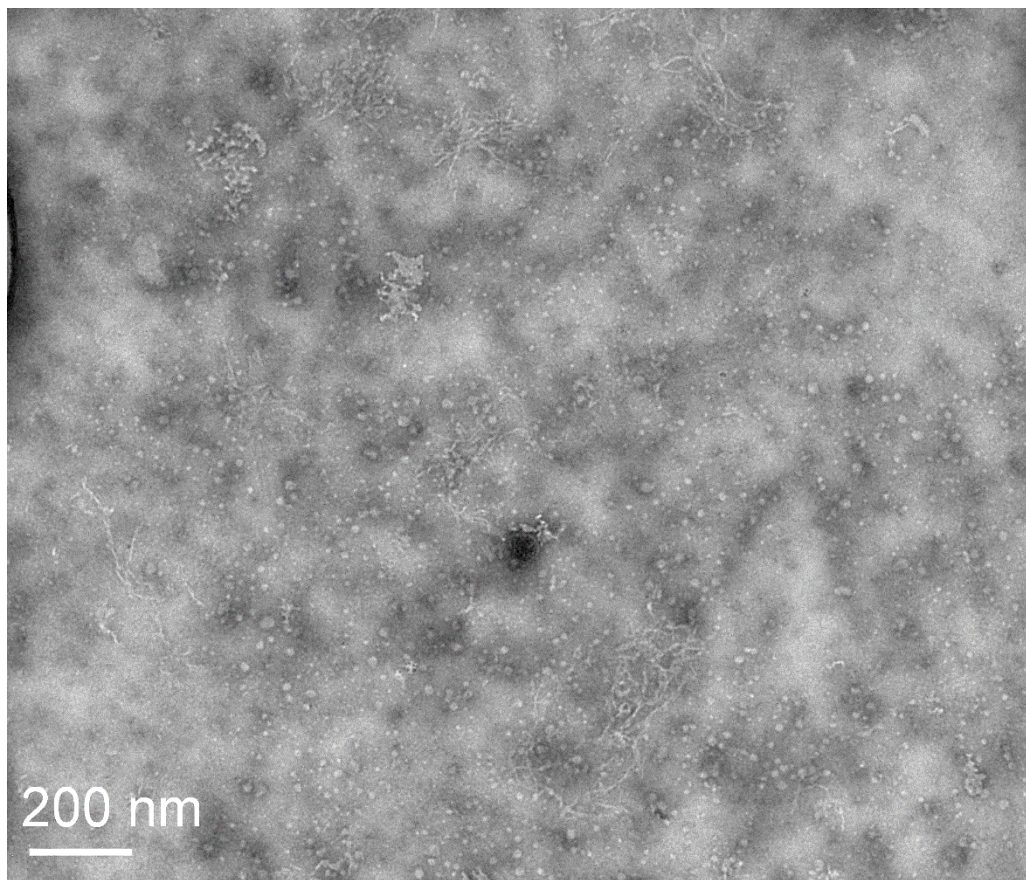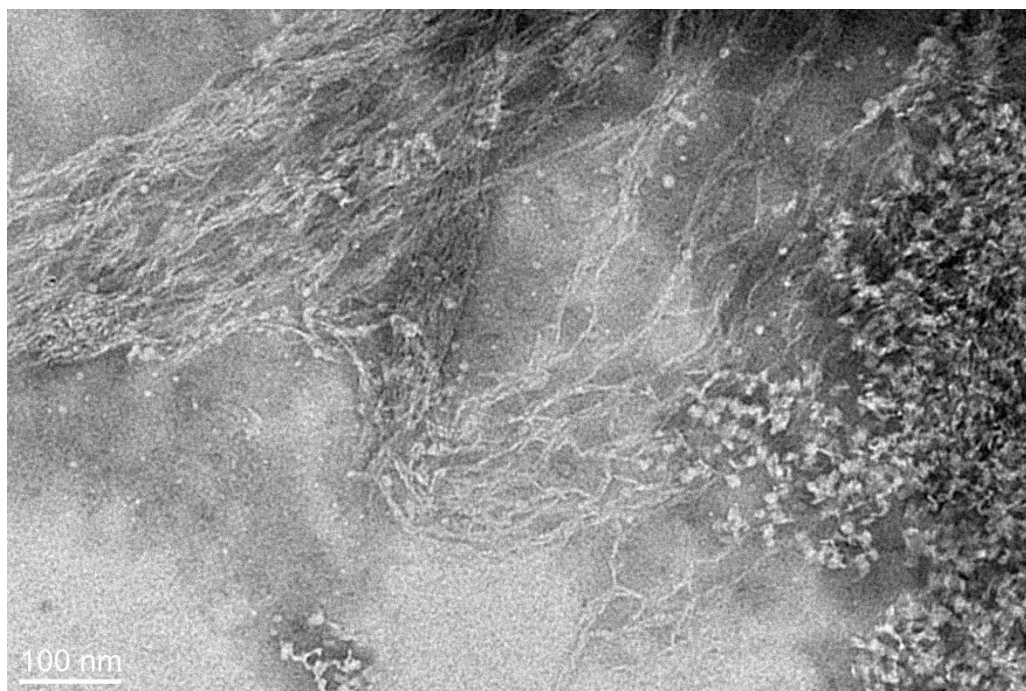



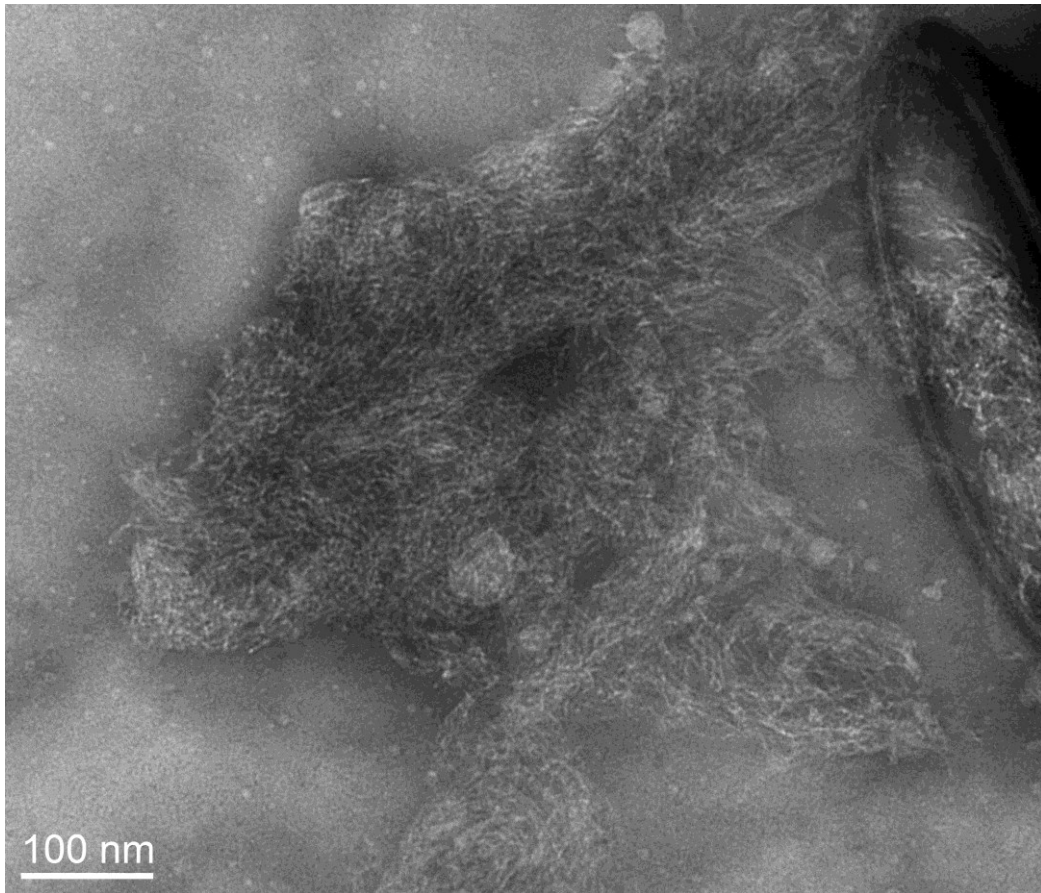

Peptide at 10 mM:

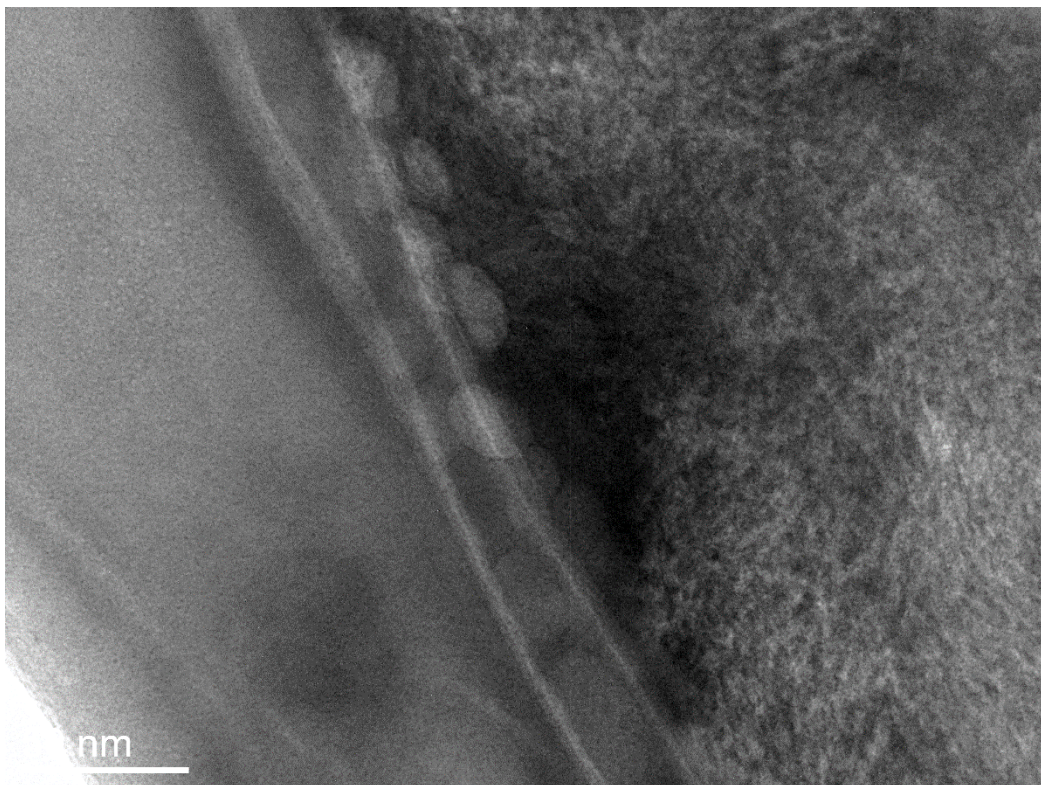

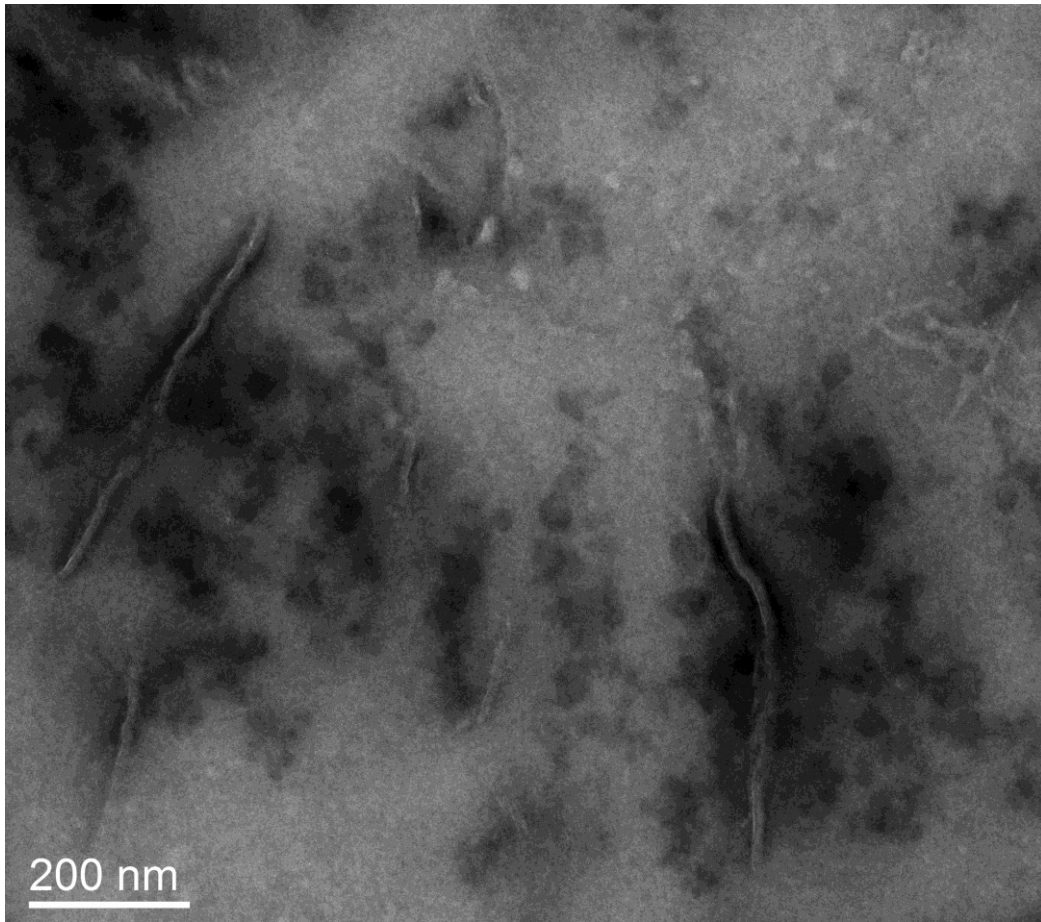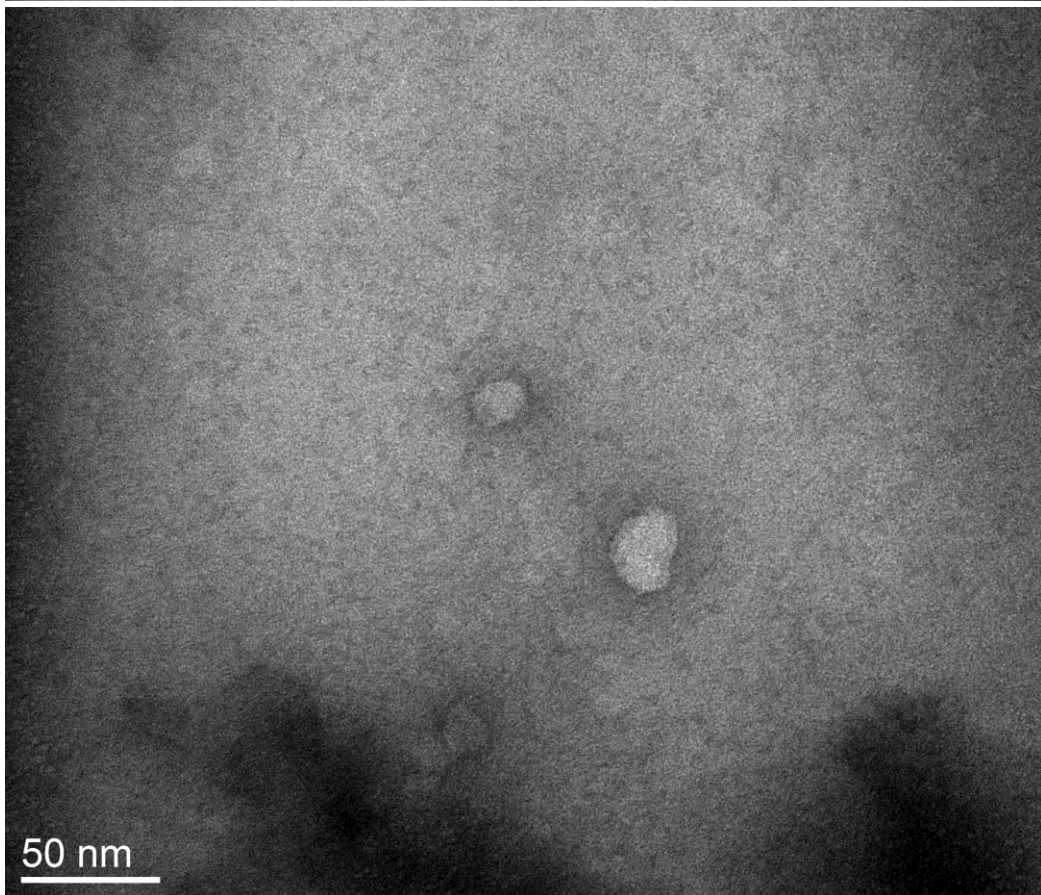

Supplement: c7cc03371k1.pdf [file c7cc03371k1.pdf]
